# Supplementary material for: Longitudinal survey data for diversifying temporal dynamics in flood risk modelling
Source: Copernicus journal article supplement (doi:10.5194/nhess-21-2811-2021), 2021-09-14
Supplement: Supplementary file 1 [file nhess-21-2811-2021-supplement.zip]

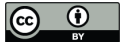

## *Supplement of*

# **Longitudinal survey data for diversifying temporal dynamics in flood risk modelling**

**Elena Mondino et al.**

*Correspondence to:* Elena Mondino ([elena.mondino@geo.uu.se](mailto:elena.mondino@geo.uu.se))

- nhess-21-2811-2021-supplement-title-page.pdf
- Supplementary\_files\_NHESS
  - .DS\_Store
  - Dataset\_forReview
    - \* Panel\_dataset.csv
    - \* RepeatedCrossSectional\_dataset.csv
    - \* SurveyForm\_EnglishTranslation.pdf
    - \* SurveyForm\_Italian.pdf
    - \* Variables\_information.xlsx
  - SupplementaryMaterial\_SurveyForm.pdf
  - SupplementaryMaterial\_TableS1.pdf

The copyright of individual parts of the supplement might differ from the article licence.
